# Supplementary material
Source: publisher figshare collection journal article supplement (https://acs.figshare.com/ndownloader/files/4702093)
Supplement: Supplementary file 1 [file 4702093]

## Supporting Information for:

# Unexpected Phenyl Group Rearrangement during an Intramolecular Scholl Reaction Leading to an Alkoxy-substituted Hexa-*peri*-hexabenzocoronene

*Xi Dou, Xiaoyin Yang, Graham J. Bodwell<sup>†</sup>, Manfred Wagner, Volker Enkelmann and Klaus Müllen\**

Max-Planck-Institute for Polymer Research, Ackermannweg 10, D-55128 Mainz, Germany

Fax: +49-6131-379350

Email: [muellen@mpip-mainz.mpg.de](mailto:muellen@mpip-mainz.mpg.de)

<sup>†</sup>Department of Chemistry, Memorial University, St. John's NL, Canada A1B 3X7

## Experimental Details

### General Methods:

Chemicals were obtained from Fluka, Aldrich, and ABCR and used as received. <sup>1</sup>H NMR and <sup>13</sup>C NMR spectra were recorded on a Bruker DPX 250, Bruker DRX 500 or Bruker DRX 700 spectrometer with use of the solvent proton or carbon signal as an internal standard. Field Desorption (FD) mass spectra were obtained on a VG Instruments ZAB 2-SEFPD instrument. MALDI-TOF mass spectra were measured using a Bruker Reflex II-TOF spectrometer using a 337 nm nitrogen laser and 7,7,8,8-tetracyanoquinodimethane (TCNQ) as matrix. Data collections for the crystal structure analysis were performed on a Nonius KCCD diffractometer with graphite monochromated Mo-K $\alpha$  radiation at a temperature of 120 K. Elemental analyses were carried out on a Foss Heraeus Vario EL apparatus in the Institute for Organic Chemistry at the Johannes Gutenberg University, Mainz.

### Synthesis:

**1,4-Bis(4-methoxyphenyl)-2,3,5,6-tetrakis(dodecylphenyl)benzene (2).** A mixture of 1,4-diiodo-2,3,5,6-tetrakis(4-dodecylphenyl)benzene (**1**)<sup>1</sup> (1.3 g, 1.0 mmol), 4-methoxyphenylboronic acid (0.76 g, 5.0 mmol), Pd(PPh<sub>3</sub>)<sub>4</sub> (60 mg, 0.050 mmol), K<sub>2</sub>CO<sub>3</sub> (2.7

g, 19.6 mmol), Aliquat<sup>®</sup> 336 (7 mg, 0.02 mmol) and toluene (30 mL) in a 100 mL Schlenk reaction flask was thoroughly degassed using the “freeze-thaw” method. The mixture was heated to 100 °C under an argon atmosphere. After 48 h, the reaction was quenched by adding distilled water (30 mL). Dichloromethane (200 mL) was added and the layers were separated. The organic phase was dried over MgSO<sub>4</sub>. The residue was purified by column chromatography using petroleum ether (PE) / dichloromethane (DCM) 8/1 as eluent (*R<sub>f</sub>* = 0.2). Compound **2** (1.15 g, 91%) was isolated as a colorless oil. **MS** (FD, 8 kV): *m/z* (%) = 1267.6 (100%, M<sup>+</sup>) (calcd. for C<sub>92</sub>H<sub>130</sub>O<sub>2</sub> = 1268.06 g mol<sup>-1</sup>); **<sup>1</sup>H-NMR** (250 MHz, CD<sub>2</sub>Cl<sub>2</sub>): δ = 6.73-6.64 (m, 20H, aryl-*H*), 6.40 (d, <sup>3</sup>*J* = 8.8 Hz, 4H, aryl-*H*), 3.59 (s, 6H, -OCH<sub>3</sub>), 2.37 (t, <sup>3</sup>*J* = 6.8 Hz, 8H, α-CH<sub>2</sub>), 1.43-1.13 (m, 80H, alkyl-*H*), 0.88 (m, 12H, -CH<sub>3</sub>); **<sup>13</sup>C-NMR** (62.5 MHz, CD<sub>2</sub>Cl<sub>2</sub>): δ = 157.3, 140.9, 140.2, 139.8, 138.7, 133.9, 132.8, 131.6, 126.9, 112.2, 55.2, 35.6, 32.3, 31.6, 30.09, 30.06, 30.0, 29.9, 29.82, 29.76, 29.3, 23.1, 14.3; **Elemental Analysis** C 87.03%, H 10.01%, (calcd. for C<sub>92</sub>H<sub>130</sub>O<sub>2</sub>: C 87.14%, H 10.33%).

**5,11,14,17-Tetradodecyl-2,8-dimethoxy-hexa-*peri*-hexabenzocoronene (3).** Compound **2** (200 mg, 0.16 mmol) was dissolved in dichloromethane (200 mL) and the solution was bubbled with argon for 20 min. FeCl<sub>3</sub>/CH<sub>3</sub>NO<sub>2</sub> solution (1.7 mL, 1.89 M, 3.2 mmol) was then added dropwise. The reaction was quenched by adding methanol (300 mL) after 20 min. The solvent was removed under reduced pressure and the crude product was filtered through a short silica-pad with hot toluene. Compound **3** (40 mg, 20%) was obtained as a yellow powder after purification by recrystallization from toluene. **MS** (MALDI-TOF, TCNQ): *m/z* (%) = 1256 (100%, M<sup>+</sup>) (calcd. for C<sub>92</sub>H<sub>118</sub>O<sub>2</sub> = 1255.97 g mol<sup>-1</sup>); **<sup>1</sup>H-NMR** (500 MHz, CDCl<sub>3</sub>): δ = 7.91 (s, 2H, aryl-*H<sub>a</sub>*), 7.87 (s, 2H, aryl-*H<sub>b</sub>*), 7.67 (s, 2H, aryl-*H<sub>c</sub>*), 7.40 (s, 2H, aryl-*H<sub>f</sub>*), 7.36 (s, 2H, aryl-*H<sub>d</sub>*), 7.21 (s, 2H, aryl-*H<sub>e</sub>*), 3.75 (s, 6H, -OCH<sub>3</sub>), 2.78 (t, <sup>3</sup>*J* = 7.7 Hz, 2H, *H<sub>2</sub>*), 2.65 (t, <sup>3</sup>*J* = 7.7 Hz, 4H, *H<sub>1</sub>*), 2.36 (t, <sup>3</sup>*J* = 7.7 Hz, 2H, *H<sub>3</sub>*), 1.85 (m, 2H, β-CH<sub>2</sub>), 1.77 (m, 6H, β-CH<sub>2</sub>), 1.52-1.23 (m, 86H, alkyl-*H*), 0.88 (m, 12H, -CH<sub>3</sub>); **<sup>13</sup>C-NMR** (125 MHz,

CDCl<sub>3</sub>):  $\delta$  = 148.0, 130.3, 130.1, 130.0, 121.9, 121.8, 120.4, 120.3, 119.8, 119.6, 113.9, 113.7, 111.9, 111.8, 111.7, 110.5, 110.4, 110.2, 110.1, 109.9, 108.8, 108.5, 97.1, 97.0, 46.2, 28.4, 28.2, 27.9, 23.4, 23.3, 23.1, 22.9, 21.3, 21.3, 21.2, 21.1, 21.0, 20.9, 20.8, 20.5, 13.8, 5.1;

**Elemental Analysis** C 87.25%, H 9.88%, (calcd. for C<sub>92</sub>H<sub>118</sub>O<sub>2</sub>: C 87.98%, H 9.47%).

**5,11-Bis[4'-dodecylphenyl]-2,8-didodecyl-6,12-bis[spiro(6'-oxo-cyclohexa-1',4'-diene)-**

**3']indeno[1,2-*b*]fluorene (4).** The mother liquor, which was used for the recrystallization of

compound **3**, was concentrated. Column chromatography was used for the purification with

an eluent of PE/DCM (2/3) (*R<sub>f</sub>* = 0.1). The resulting product was further recrystallized from a

DCM/acetone (1/1) mixture to afford compound **4** (138 mg, 70%) as brown crystal. **MS** (FD,

8 kV): *m/z* (%) = 1236.8 (100%, M<sup>+</sup>), 618.2 (21%, M<sup>2+</sup>), (calcd. for C<sub>90</sub>H<sub>122</sub>O<sub>2</sub> = 1235.97 g

mol<sup>-1</sup>); **<sup>1</sup>H-NMR** (250 MHz, CD<sub>2</sub>Cl<sub>2</sub>):  $\delta$  = 7.19 (s, 8H, aryl-*H*), 6.82 (s, 2H, aryl-*H*), 6.81 (d,

<sup>3</sup>*J* = 8.6 Hz, 2H, aryl-*H*), 6.54 (d, <sup>3</sup>*J* = 9.8 Hz, 4H, ethenyl-*H*), 6.19 (d, <sup>3</sup>*J* = 7.9 Hz, 2H, aryl-

*H*), 6.05 (d, <sup>3</sup>*J* = 9.8 Hz, 4H, ethenyl-*H*), 2.69 (t, <sup>3</sup>*J* = 7.2 Hz, 4H,  $\alpha$ -CH<sub>2</sub>), 2.46 (t, <sup>3</sup>*J* = 7.7 Hz,

4H,  $\alpha$ -CH<sub>2</sub>), 1.67 (m, 4H,  $\beta$ -CH<sub>2</sub>), 1.39-1.21 (m, 76H, alkyl-*H*), 0.91-0.84 (m, 12H, -CH<sub>3</sub>);

**<sup>13</sup>C-NMR** (62.5 MHz, CD<sub>2</sub>Cl<sub>2</sub>):  $\delta$  = 185.7, 149.9, 144.0, 143.4, 143.3, 142.8, 139.7, 139.2,

136.2, 133.9, 130.0, 129.3, 128.9, 128.4, 124.5, 123.7, 56.9, 36.1, 32.3, 32.3, 31.9, 31.9, 30.1,

30.1, 29.99, 29.97, 29.91, 29.8, 29.7, 29.6, 23.1, 14.3, 14.2; **Elemental Analysis** C 87.35%,

H 9.98%, (calcd. for C<sub>90</sub>H<sub>122</sub>O<sub>2</sub>: C 87.46%, H 9.95%).

---

<sup>1</sup> Yang, X.; Dou, X; Müllen, K. *Efficient Synthesis of Symmetrically and Unsymmetrically substituted Hexaphenylbenzene (HPB) Analogues via Sterically Hindered Suzuki-Miyaura Coupling Reaction*, in preparation.

### Structure assignment of compound 3:

On the one-dimensional  $^1\text{H}$ -NMR (Figure 1a), the three triplet peaks with a coupling constant  $^3J = 7.5$  Hz in the region from 2.79 to 2.35 ppm were assigned to the three different alkyl  $\alpha$ -protons next to aromatic core. According to their integral values, the triplet peak around 2.65 ppm with an integral value two times bigger than the values of the other two triplet peaks were attributed to  $\text{H}_1$ , which coupled with four aromatic protons,  $\text{H}_a$ ,  $\text{H}_b$ ,  $\text{H}_c$  and  $\text{H}_d$  on  $^1\text{H}$ ,  $^1\text{H}$  NOESY spectrum (Figure 1b for correlations, Figure S1A for NOESY spectra). The alkyl  $\alpha$ -proton signal at 2.78 ppm, which only showed correlation peaks with two aromatic protons ( $\text{H}_a$  and  $\text{H}_b$ , which also coupled with  $\text{H}_1$ ) on  $^1\text{H}$ ,  $^1\text{H}$  NOESY spectrum, was evaluated as  $\text{H}_2$ . The remaining one at 2.36 ppm was naturally justified as  $\text{H}_3$ , which showed two coupling signals with another two aromatic protons,  $\text{H}_c$  and  $\text{H}_f$ , in the  $^1\text{H}$ ,  $^1\text{H}$  NOESY spectrum. The singlet peak at 3.75 ppm represented six protons on two methoxyl groups,  $\text{H}_g$ , with same chemical environment. This assignment was further confirmed by its correlation with four nearby aromatic protons,  $\text{H}_c$ ,  $\text{H}_d$ ,  $\text{H}_e$  and  $\text{H}_f$  on  $^1\text{H}$ ,  $^1\text{H}$  NOESY spectrum (Figure S1B).

The differentiation between the aromatic protons  $\text{H}_a$  and  $\text{H}_b$ ;  $\text{H}_c$  and  $\text{H}_d$ ;  $\text{H}_e$  and  $\text{H}_f$  were further achieved by the  $^1\text{H}$ ,  $^1\text{H}$  COSY spectrum (Figure S1D) and supplemented with data from  $^1\text{H}$ ,  $^1\text{H}$  NOESY spectrum (Figure S1C). In the  $^1\text{H}$ ,  $^1\text{H}$  COSY spectrum, the two protons at 7.91 and 7.40 ppm each showed only one over-five-bond coupling signal with the protons at 7.87 and 7.21 ppm, respectively. The one at 7.91 ppm was substantiated as  $\text{H}_a$  because it did not correlate with the protons on methoxyl group,  $\text{H}_g$ , according to  $^1\text{H}$ ,  $^1\text{H}$  NOESY spectrum. The signal at 7.40 ppm was therefore proved for  $\text{H}_f$  coupling with  $\text{H}_g$  as described before. Consequently,  $\text{H}_b$  and  $\text{H}_e$  were separately verified at 7.87 and 7.21 ppm as solely coupled protons of  $\text{H}_a$  and  $\text{H}_f$  on  $^1\text{H}$ ,  $^1\text{H}$  COSY spectrum. Theoretically,  $\text{H}_b$  should correlate not only with  $\text{H}_a$  over five aromatic bonds but also with  $\text{H}_c$  over four bonds. Thus, the signal at 7.67 ppm, the other coupling signal of  $\text{H}_b$ , was allocated to  $\text{H}_c$ .  $\text{H}_d$  was assigned to the signal at

7.36 ppm due to its correlation with both H<sub>e</sub> and H<sub>c</sub> in a similar way. All the assignments were further proved by aromatic proton coupling on <sup>1</sup>H, <sup>1</sup>H NOESY spectrum, which showed correlations between H<sub>a</sub> and H<sub>b</sub>, H<sub>c</sub> and H<sub>d</sub>, H<sub>e</sub> and H<sub>f</sub>.

### H,H NOESY spectra for 3:

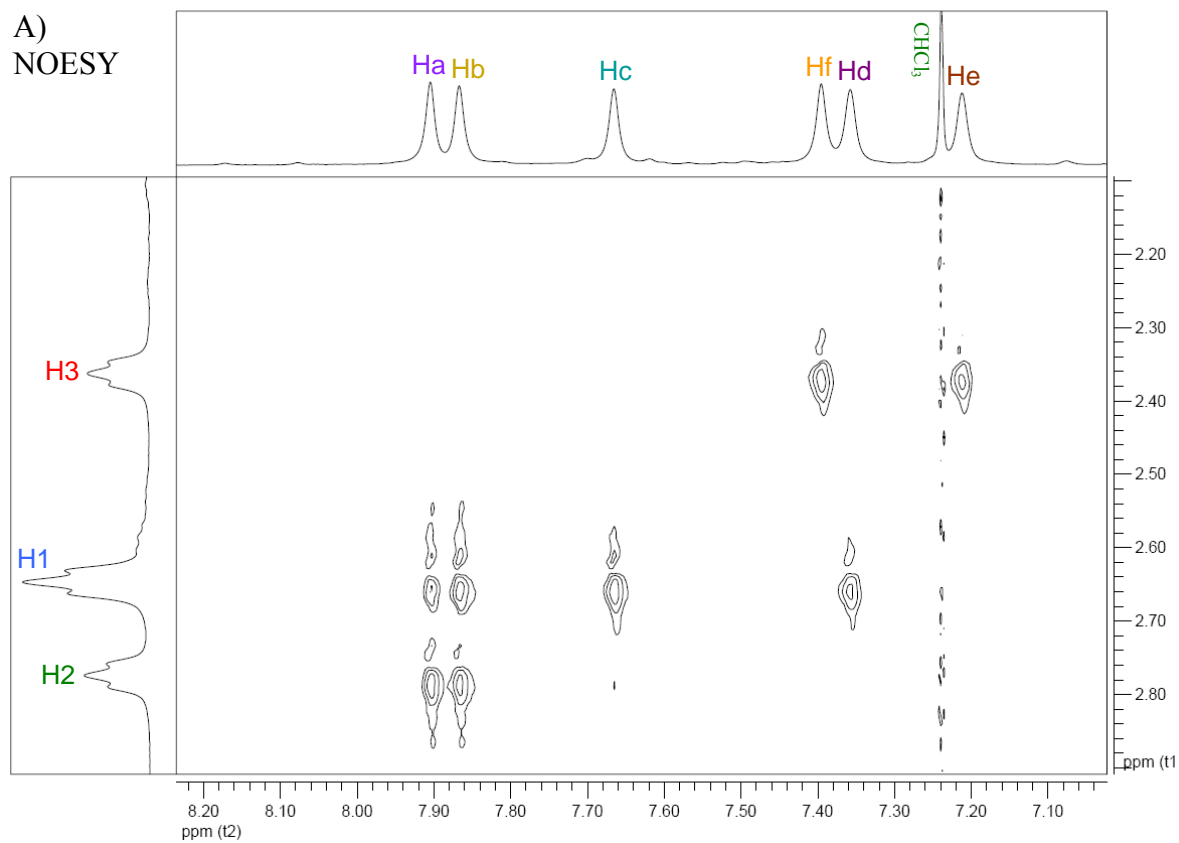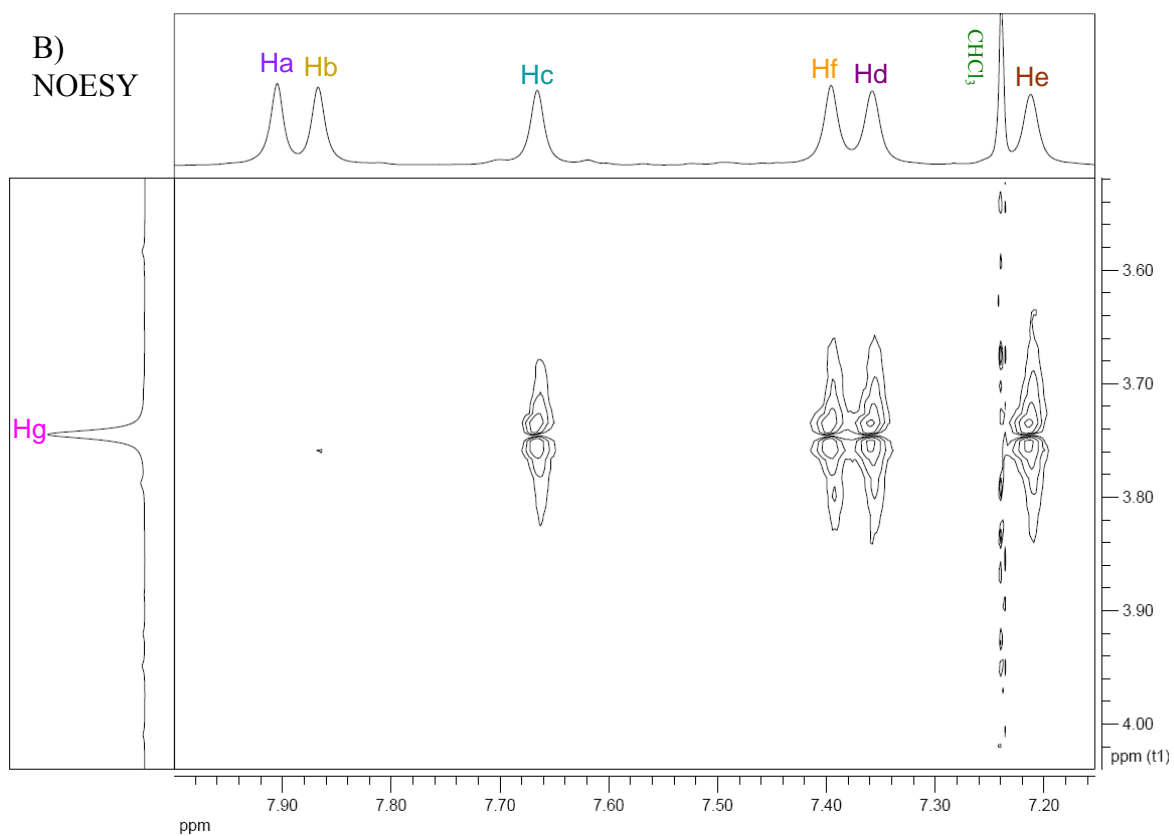

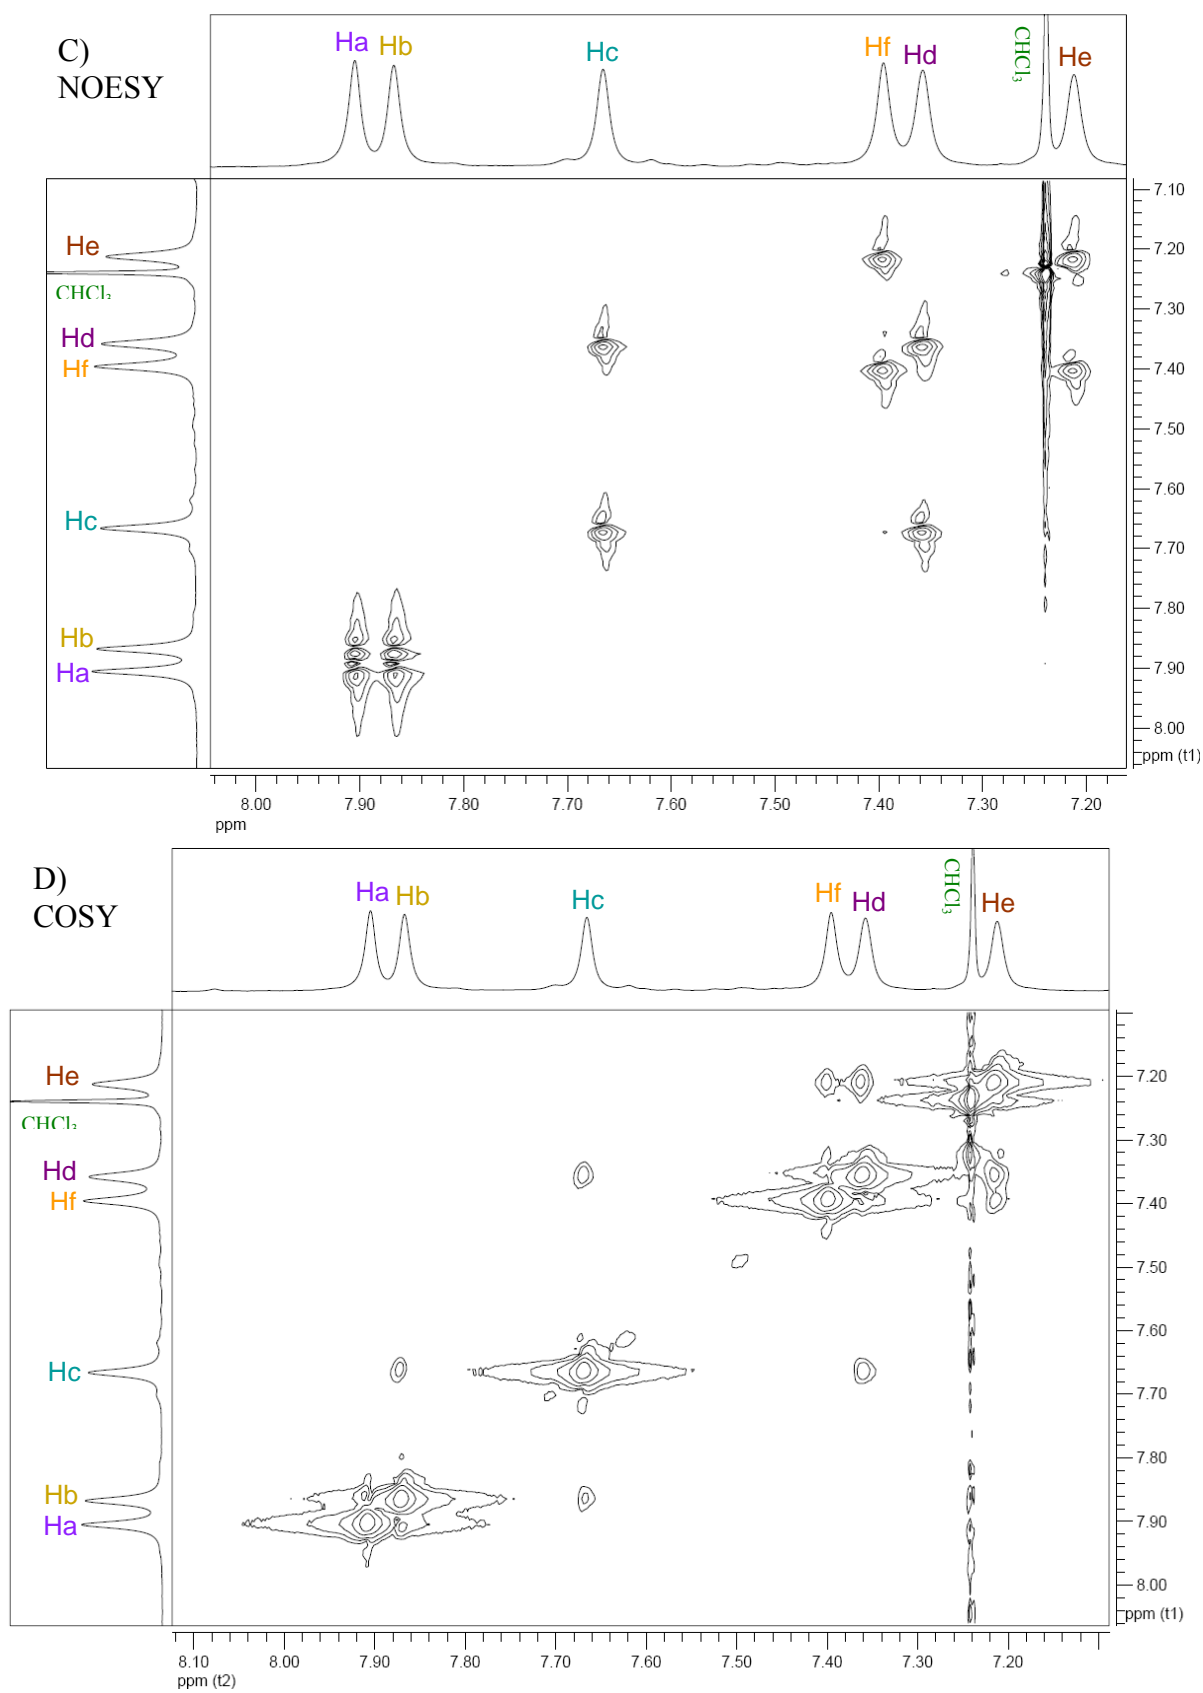

**Figure S1.**  $^1\text{H}$ ,  $^1\text{H}$ -NOESY and COSY spectra of compound **3** ( $\text{CDCl}_3$ , rt, 500 MHz); coupling between A) alkyl  $\alpha$ -protons and aromatic, B) methoxy protons and aromatic, aromatic, C) aromatic protons in NOESY spectrum and D) aromatic protons in COSY spectrum

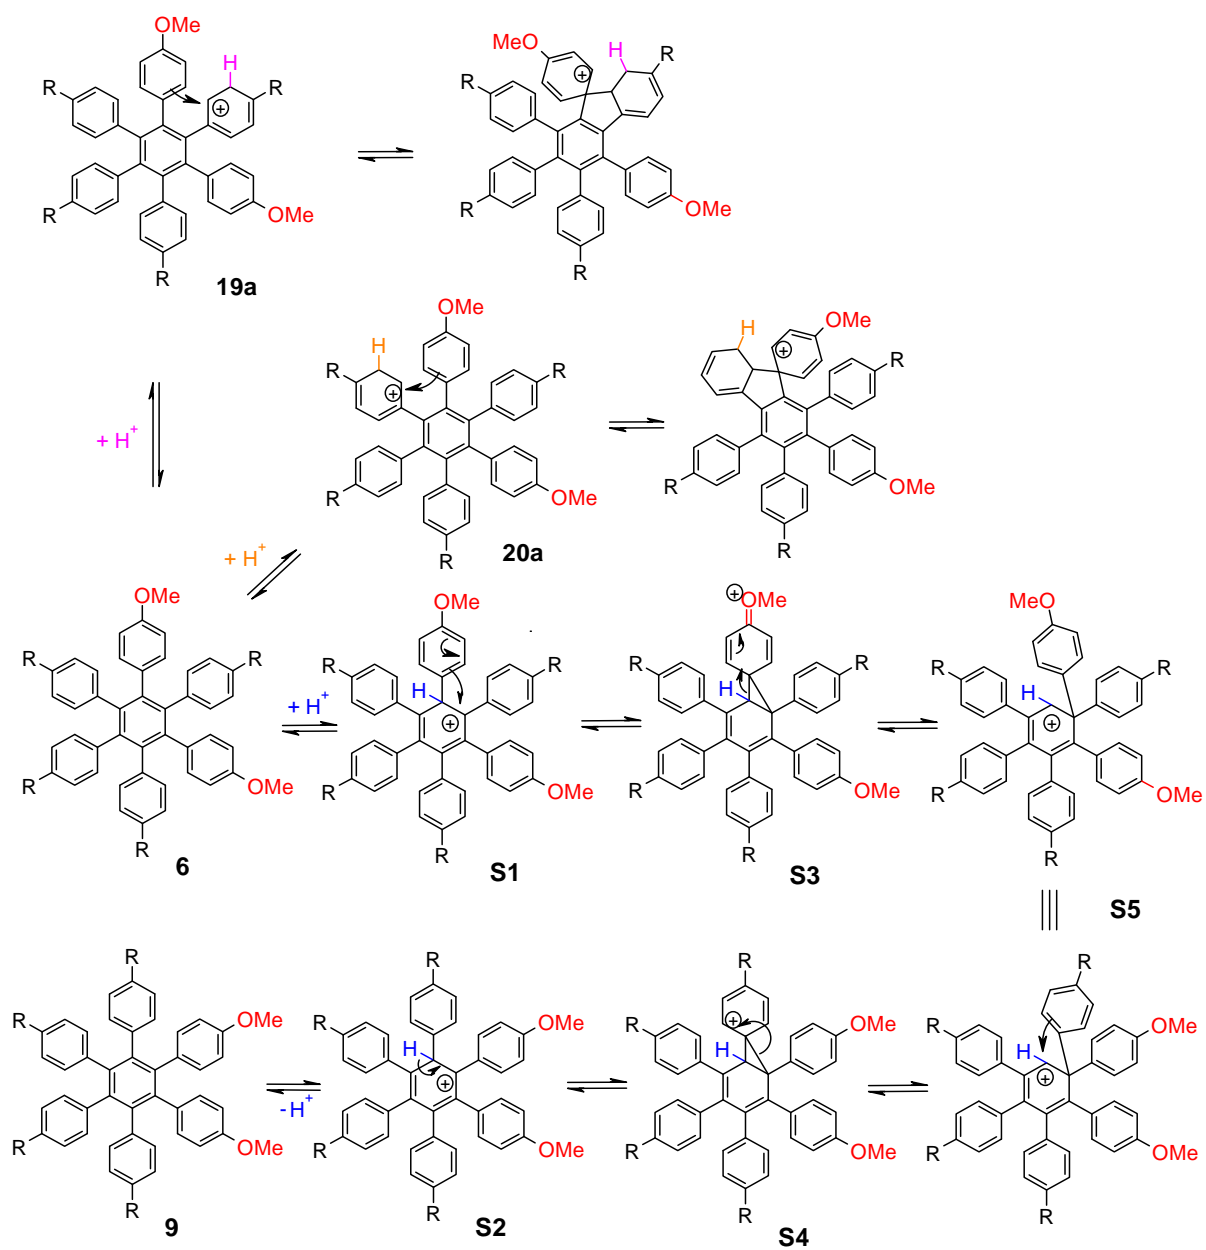

**Scheme S1.** Proposed mechanism for the five-membered-ring closure of "meta"-dimethoxy HPB **6** and the formation of a possible intermediate "ortho"-dimethoxy HPB **9**.



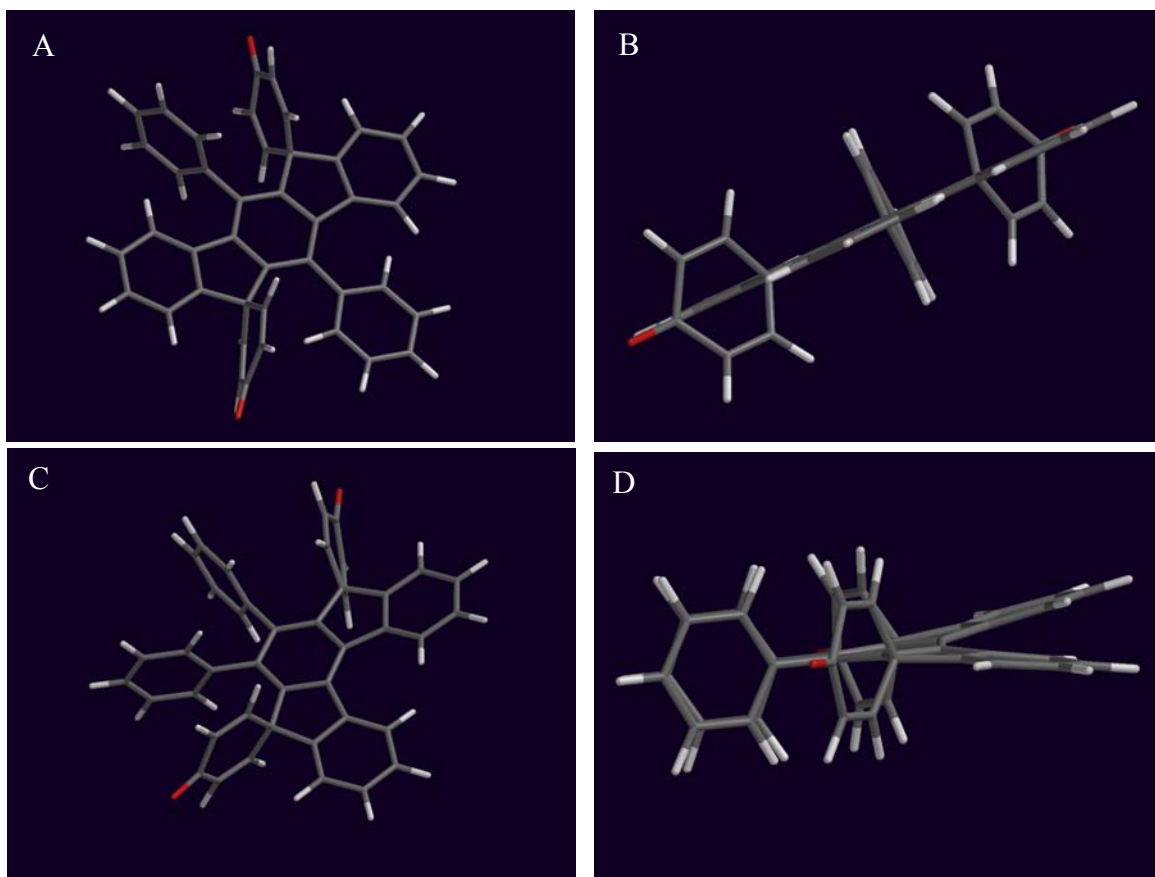

**Figure S2.** PM3-calculated molecular geometry of compound **4** (A, top view; B, side view) and **7** (C, top view; D, side view). All alkyl chains are neglected to simplify the calculation.
